# Supplementary material for: Hexahydric component metal organic frameworks constructed by multiple ligands and mixed-valence ions
Source: Royal Society of Chemistry journal article supplement (doi:10.1039/d2qi00291d), 2022-01-01
Supplement: d2qi00291d1.pdf [file d2qi00291d1.pdf]

## Supporting Information

### Hexahydric component metal organic frameworks constructed by multiple ligands and mixed-valence ions

Wen-Liang Li, Tian-Ran Li, Xin-Jie Du, Jiong-Peng Zhao\* and Fu-Chen Liu\*

#### Materials and methods

All of the materials for syntheses are obtained commercially and used without further purification. The powder X-ray diffraction (PXRD) data are characterized using a Rigaku D/Max-2500 diffractometer with a Cu-target tube and a graphite monochromator (40 kV, 100 mA). Simulated PXRD spectra are derived from modulating the single-crystal X-ray diffraction (SCXRD) data via the Mercury software. The electronic conductivity tests are carried out by PARSTAT MC (aka PMC) electrochemical workstation. Oxygen evolution reaction measurements are conducted on a CHI760E electrochemical workstation with a standard three-electrode system. ICP-OES data are tested by Agilent 5110. X-ray photoelectron spectroscopy (XPS) images were collected on a Thermo Scientific Escalab 250 Xi XPS spectrometer. The morphologies structures of the samples were measured by using the Scanning electron microscope (ZEISS MERLIN Compact).

#### Synthesis method

$[\text{CH}_3\text{NH}_2\text{CH}_3]_2[\text{Fe}^{\text{III}}_2\text{Fe}^{\text{II}}_{10}(\text{tz})_{11}(\text{HCO}_2)_{12}(\text{btc})_{5/3}]$  (**1**): A mixture of  $\text{FeCl}_2 \cdot 4\text{H}_2\text{O}$  (0.5 mmol),  $\text{FeCl}_3 \cdot 6\text{H}_2\text{O}$  (0.5 mmol),  $\text{H}_3\text{btc}$  (0.25 mmol),  $\text{Htz}$  (1 mmol),  $\text{K}_2\text{CO}_3$  (0.25 mmol),  $\text{N,N}$ -Dimethylformamide (8 mL), and  $\text{H}_2\text{O}$  (4 mL) is sealed in a 25 mL Teflon-lined stainless steel autoclave. The autoclave is heated at 140 °C for 72 h under autogenous pressure and then cooled slowly to room temperature at a rate of 2 °C·h<sup>-1</sup>. Yellow triangle block crystals are obtained.

$[\text{CH}_3\text{NH}_2\text{CH}_3]_2[\text{Fe}^{\text{III}}_2\text{Fe}^{\text{II}}_2\text{Co}^{\text{II}}_8(\text{tz})_{11}(\text{HCO}_2)_{12}(\text{btc})_{5/3}]$  (**2**): A mixture of  $\text{FeCl}_2 \cdot 4\text{H}_2\text{O}$  (0.5 mmol),  $\text{CoCl}_2 \cdot 6\text{H}_2\text{O}$  (0.5 mmol),  $\text{H}_3\text{btc}$  (0.25 mmol),  $\text{Htz}$  (1 mmol),  $\text{K}_2\text{CO}_3$  (0.25 mmol),  $\text{N,N}$ -Dimethylformamide (8 mL), and  $\text{H}_2\text{O}$  (4 mL) is sealed in a 25 mL Teflon-lined stainless steel autoclave. The autoclave is heated and then cooled in the same way as **1**. Red triangle block crystals were obtained.

#### X-ray Crystallography

X-ray single-crystal diffraction data for these crystals were collected on a Rigaku Xtlab-Min diffractometer at 293(2) K with Mo K $\alpha$  radiation ( $\lambda = 0.71073 \text{ \AA}$ ) by  $\omega$  scan mode. The program CrysAlisPro 1.171.39.7e<sup>sl</sup>a was used for the integration of the diffraction profiles. The structure was determined by intrinsic phasing method using ShelXT<sup>sl</sup>b and refined by full-matrix least-squares methods using ShelXL<sup>sl</sup>c with Olex2.<sup>sl</sup>d The crystal data of **1** and **2** are shown in **Table S1**. The selected bond lengths

and angles are given in **Table S2** and **Table S3**.

## Electronic conductivity measurement

Electronic conductivity measurement is conducted by two-probe contact method. The compacted tablet used for conductivity measurements has a diameter of 0.5 cm with the thickness 0.12 cm for **1** and 0.14 cm for **2**, which are obtained by pressing crystal powders at 8 Mpa for 1 min. The tablet is sandwiched by two copper-plated electrodes. The electronic conductivity measurement is performed on the electrochemical workstation PMC under ambient condition. Linear  $I$ - $V$  curve is obtained by sweeping the voltage from -1V to 1V.

The electronic conductor  $\sigma$  could be calculated by the express  $\sigma = \frac{IL}{VS}$ , where the  $L$  is the length of the crystal,  $S$  represents the cross-sectional area of the crystal, and the value of  $I$  and  $V$  could be obtained by the  $I$ - $V$  curve.

Electrochemical impedance spectroscopy (EIS) of **1** and **2** are the fitting results under the Q(QR) and R(QR)(QR) circuit models, respectively, as shown in **Fig. S4**.

## Oxygen evolution reaction (OER) measurement

A glassy carbon rotating disk electrode (RDE, diameter, 5 mm) or rotating ring-disk electrode (RRDE, disk diameter: 5.5 mm) is used as the working electrode, the carbon rod was used as counter electrode and an Ag/AgCl (3 M KCl) is used as reference electrode. To prepare the catalyst-coated working electrode, 6 mg of the as-synthesized catalyst (or 6mg catalyst and 6mg conductive carbon black) is dispersed in the mixing solution of 500  $\mu$ L H<sub>2</sub>O, 500  $\mu$ L EtOH and 50  $\mu$ L nafion (5%) under sonication for 1 h to form a homogeneous catalyst ink. A 12  $\mu$ L amount of the mixture is dropped onto a polished glassy carbon electrode (5 mm in diameter) in sequence and dried in air. All the recorded potential has been converted to reversible hydrogen electrode (RHE) as follows:

$$E_{RHE} = E_{Ag/AgCl} + E_{Ag/AgCl}^{\theta} + 0.059 pH$$

OER performances of as-prepared catalysts is measured in 1 M KOH aqueous solution at room temperature. The electrochemistry measurements are represented with 95% iR compensation rate. Linear sweep voltammetry (LSV) polarization curves is performed in O<sub>2</sub> saturated electrolyte. LSV polarization curves are measured with a sweep rate of 5 mV s<sup>-1</sup>.

## I-t stability measurement

The long-term stability test was carried on RRDE working electrode. The material configuration and test methods are shown in the OER measurement. The sample used for PXRD test before and after i-t test was obtained by coating the sample on 1.5\*1cm<sup>2</sup> hydrophobic carbon paper. The PXRD pattern was collected before and after 2h i-t test.

## TOF calculations

For OER, the TOF value is usually calculated by the equation:

$$TOF = (JA) / (4Fn)$$

where  $J$  is the current density after 95% iR corrected,  $A$  is the geometric area of the

electrode (0.196 cm<sup>2</sup>),  $F$  is Faraday's constant and  $n$  is the molar number of active sites. In our study, we suppose Co and Fe as active sites for catalysts. For the structural transformation during electrocatalysis, there is no structural information for surface species. Therefore, we use all the metals in the catalyst as active species. And  $n$  is calculated by the following formula:  $n = 12 * m / M_w$ .

## References

- S1. (a) CrysAlisPro 1.171.39.7e, Empirical absorption correction using spherical harmonics, implemented in SCALE3 ABSPACK scaling algorithm. Rigaku Oxford Diffraction, 2015. (b) G. M. Sheldrick, *Acta Crystallogr. Sect. A: Found. Adv.*, 2015, **71**, 3–8. (c) G. M. Sheldrick, *Acta Crystallogr. Sect. C: Struct. Chem.*, 2015, **71**, 3–8. (d) O. V. Dolomanov, L. J. Bourhis, R. J. Gildea, J. A. K. Howard and H. Puschmann, *J. Appl. Crystallogr.*, 2009, **42**, 339–341.

**Table S1** Crystal data for **1** and **2**.

|                                                       | <b>1</b>                                                                         | <b>2</b>                                                                                        |
|-------------------------------------------------------|----------------------------------------------------------------------------------|-------------------------------------------------------------------------------------------------|
| Empirical formula                                     | C <sub>53</sub> H <sub>55</sub> Fe <sub>12</sub> N <sub>35</sub> O <sub>34</sub> | C <sub>53</sub> H <sub>55</sub> Co <sub>8</sub> Fe <sub>4</sub> N <sub>35</sub> O <sub>34</sub> |
| Formula weight                                        | 2396.52                                                                          | 2421.16                                                                                         |
| Temperature, K                                        | 293(2)                                                                           | 293(2)                                                                                          |
| Crystal system                                        | hexagonal                                                                        | hexagonal                                                                                       |
| Space group                                           | <i>P</i> -62 <i>m</i>                                                            | <i>P</i> -62 <i>m</i>                                                                           |
| <i>A</i> , <i>b</i> , Å                               | 29.5235(14)                                                                      | 29.351(10)                                                                                      |
| <i>c</i> , Å                                          | 9.5830(5)                                                                        | 9.495(4)                                                                                        |
| $\alpha = \beta$ , deg                                | 90                                                                               | 90                                                                                              |
| $\gamma$ , deg                                        | 120                                                                              | 120                                                                                             |
| Volume, Å <sup>3</sup>                                | 7233.8(7)                                                                        | 7084(5)                                                                                         |
| <i>Z</i>                                              | 3                                                                                | 3                                                                                               |
| $\rho_{\text{calc}}$ , g/cm <sup>3</sup>              | 1.65                                                                             | 1.703                                                                                           |
| $\mu$ , mm <sup>-1</sup>                              | 1.838                                                                            | 2.053                                                                                           |
| <i>F</i> (000)                                        | 3606                                                                             | 3630                                                                                            |
| Radiation                                             | Mo K $\alpha$ ( $\lambda = 0.71073$ )                                            | Mo K $\alpha$ ( $\lambda = 0.71073$ )                                                           |
| Reflections collected                                 | 30339                                                                            | 13642                                                                                           |
| Data/restraints/parameters                            | 4610/18/375                                                                      | 4436/71/335                                                                                     |
| Goodness-of-fit on <i>F</i> <sup>2</sup>              | 1.044                                                                            | 0.932                                                                                           |
| Final R indexes [ <i>I</i> > 2 $\sigma$ ( <i>I</i> )] | R <sub>1</sub> = 0.0473, wR <sub>2</sub> = 0.1151                                | R <sub>1</sub> = 0.0990, wR <sub>2</sub> = 0.2045                                               |
| Final R indexes [all data]                            | R <sub>1</sub> = 0.0581, wR <sub>2</sub> = 0.1295                                | R <sub>1</sub> = 0.2504, wR <sub>2</sub> = 0.3048                                               |

$$R_1 = \frac{\sum ||F_o| - |F_c||}{\sum |F_o|}; wR_2 = \left[ \frac{\sum w(F_o^2 - F_c^2)^2}{\sum w(F_o^2)^2} \right]^{1/2}.$$

**Table S2** The bonds lengths(Å) and angles(°) for **1**.

| <b>1</b>                                 |           |                                             |          |
|------------------------------------------|-----------|---------------------------------------------|----------|
| Fe1-N1                                   | 2.139(8)  | N2-Fe4                                      | 2.179(8) |
| Fe1-N1 <sup>ii</sup>                     | 2.139(8)  | Fe5-O8                                      | 2.143(8) |
| Fe1-O3                                   | 2.110(8)  | Fe5-N8                                      | 2.156(7) |
| Fe1-O3 <sup>ii</sup>                     | 2.110(8)  | Fe5-N8 <sup>viii</sup>                      | 2.156(7) |
| Fe1-O4                                   | 2.250(9)  | Fe5-O11                                     | 2.201(6) |
| Fe1-O14 <sup>iii</sup>                   | 2.211(8)  | Fe5-O11 <sup>viii</sup>                     | 2.201(6) |
| Fe2-O2                                   | 2.040(12) | O15-Fe5                                     | 2.092(9) |
| Fe2-O2 <sup>v</sup>                      | 2.040(12) | Fe6-O9                                      | 2.045(8) |
| Fe2-N5 <sup>iv</sup>                     | 2.056(11) | Fe6-O11 <sup>viii</sup>                     | 2.235(6) |
| Fe2-N5                                   | 2.056(11) | Fe6-O11                                     | 2.235(6) |
| Fe3-N4                                   | 2.188(7)  | Fe6-O12                                     | 2.067(9) |
| Fe3-N4 <sup>ii</sup>                     | 2.188(7)  | N3-Fe6 <sup>iii</sup>                       | 2.173(8) |
| Fe3-O5                                   | 2.090(9)  | Fe7-N7                                      | 2.05(2)  |
| Fe3-N6                                   | 2.142(11) | Fe7-O10 <sup>ii</sup>                       | 2.148(9) |
| Fe3-N9                                   | 2.174(7)  | Fe7-O10 <sup>vii</sup>                      | 2.148(9) |
| Fe3-N9 <sup>ii</sup>                     | 2.174(7)  | Fe7-O10 <sup>xi</sup>                       | 2.148(9) |
| Fe4-O4                                   | 2.216(9)  | Fe7-O10                                     | 2.148(9) |
| Fe4-O6                                   | 2.367(11) | Fe7-O13                                     | 2.06(2)  |
| Fe4-N10                                  | 2.149(7)  | Fe7-O13 <sup>xi</sup>                       | 2.06(2)  |
| Fe4-N10 <sup>ii</sup>                    | 2.149(7)  |                                             |          |
|                                          |           |                                             |          |
| N1 <sup>ii</sup> -Fe1-N1                 | 89.2(4)   | O15-Fe5-O8                                  | 177.6(4) |
| N1 <sup>ii</sup> -Fe1-O4                 | 83.4(3)   | O15-Fe5-N8                                  | 86.9(3)  |
| N1-Fe1-O4                                | 83.4(3)   | O15-Fe5-N8 <sup>viii</sup>                  | 86.9(3)  |
| N1 <sup>ii</sup> -Fe1-O14 <sup>iii</sup> | 96.0(3)   | O15-Fe5-O11                                 | 91.0(3)  |
| N1-Fe1-O14 <sup>iii</sup>                | 96.0(3)   | O15-Fe5-O11 <sup>viii</sup>                 | 91.0(3)  |
| O3-Fe1-N1 <sup>ii</sup>                  | 89.8(3)   | O8-Fe5-N8                                   | 91.5(2)  |
| O3 <sup>ii</sup> -Fe1-N1 <sup>ii</sup>   | 172.8(3)  | O8-Fe5-N8 <sup>viii</sup>                   | 91.5(2)  |
| O3-Fe1-N1                                | 172.8(3)  | O8-Fe5-O11                                  | 90.9(2)  |
| O3 <sup>ii</sup> -Fe1-N1                 | 89.8(3)   | O8-Fe5-O11 <sup>viii</sup>                  | 90.9(2)  |
| O3-Fe1-O3 <sup>ii</sup>                  | 90.4(5)   | N8-Fe5-N8 <sup>viii</sup>                   | 92.9(4)  |
| O3 <sup>ii</sup> -Fe1-O4                 | 89.4(3)   | N8-Fe5-O11                                  | 95.2(2)  |
| O3-Fe1-O4                                | 89.4(3)   | N8-Fe5-O11 <sup>viii</sup>                  | 171.5(3) |
| O3 <sup>ii</sup> -Fe1-O14 <sup>iii</sup> | 91.2(3)   | N8 <sup>viii</sup> -Fe5-O11 <sup>viii</sup> | 95.2(2)  |
| O3-Fe1-O14 <sup>iii</sup>                | 91.2(3)   | N8 <sup>viii</sup> -Fe5-O11                 | 171.5(3) |
| O14 <sup>iii</sup> -Fe1-O4               | 179.2(4)  | O11-Fe5-O11 <sup>viii</sup>                 | 76.6(3)  |
| O2-Fe2-O2 <sup>v</sup>                   | 90.6(7)   | N3 <sup>ix</sup> -Fe6-N3 <sup>x</sup>       | 99.2(4)  |
| O2-Fe2-N5                                | 115.3(3)  | N3 <sup>x</sup> -Fe6-O11                    | 92.8(3)  |

|                                         |                            |                                           |                                |
|-----------------------------------------|----------------------------|-------------------------------------------|--------------------------------|
| O2 <sup>v</sup> -Fe2-N5                 | 115.3(3)                   | N3 <sup>ix</sup> -Fe6-O11 <sup>viii</sup> | 92.8(3)                        |
| O2 <sup>v</sup> -Fe2-N5 <sup>iv</sup>   | 115.3(3)                   | N3 <sup>ix</sup> -Fe6-O11                 | 168.0(3)                       |
| O2-Fe2-N5 <sup>iv</sup>                 | 115.3(3)                   | N3 <sup>x</sup> -Fe6-O11 <sup>viii</sup>  | 168.0(3)                       |
| N5 <sup>iv</sup> -Fe2-N5                | 105.3(6)                   | O9-Fe6-N3 <sup>x</sup>                    | 90.3(3)                        |
| N4 <sup>ii</sup> -Fe3-N4                | 87.8 (4)                   | O9-Fe6-N3 <sup>ix</sup>                   | 90.3(3)                        |
| N4 <sup>ii</sup> -Fe3-N9                | 90.8(3)                    | O9-Fe6-O11 <sup>viii</sup>                | 90.2(3)                        |
| N4-Fe3-N9                               | 176.8(3)                   | O9-Fe6-O11                                | 90.2(3)                        |
| N4-Fe3-N9 <sup>ii</sup>                 | 90.8(3)                    | O9-Fe6-O12                                | 174.5(4)                       |
| N4 <sup>ii</sup> -Fe3-N9 <sup>ii</sup>  | 176.8(3)                   | O11 <sup>viii</sup> -Fe6-O11              | 75.2(3)                        |
| O5-Fe3-N4 <sup>ii</sup>                 | 88.8(3)                    | O12-Fe6-N3 <sup>x</sup>                   | 86.2(3)                        |
| O5-Fe3-N4                               | 88.9(3)                    | O12-Fe6-N3 <sup>ix</sup>                  | 86.2(3)                        |
| O5-Fe3-N6                               | 176.6(5)                   | O12-Fe6-O11 <sup>viii</sup>               | 94.1(3)                        |
| O5-Fe3-N9                               | 94.0(3)                    | O12-Fe6-O11                               | 94.1(3)                        |
| O5-Fe3-N9 <sup>ii</sup>                 | 94.0(3)                    | N7-Fe7-O10                                | 97.0(3)                        |
| N6-Fe3-N4 <sup>ii</sup>                 | 88.7(4)                    | N7-Fe7-O10 <sup>xi</sup>                  | 97.0(3)                        |
| N6-Fe3-N4                               | 88.7(4)                    | N7-Fe7-O10 <sup>vii</sup>                 | 97.0(3)                        |
| N6-Fe3-N9                               | 88.3(4)                    | N7-Fe7-O10 <sup>ii</sup>                  | 97.0(3)                        |
| N6-Fe3-N9 <sup>ii</sup>                 | 88.3(4)                    | N7-Fe7-O13                                | 163.8(6)                       |
| N9 <sup>ii</sup> -Fe3-N9                | 90.4(4)                    | N7-Fe7-O13 <sup>xi</sup>                  | 163.8(6)                       |
| N2-Fe4-N2 <sup>ii</sup>                 | 87.0(4)                    | O10-Fe7-O10 <sup>vii</sup>                | 83.7(6)                        |
| N2-Fe4-O4                               | 85.3(3)                    | O10 <sup>xi</sup> -Fe7-O10 <sup>ii</sup>  | 83.7(6)                        |
| N2 <sup>ii</sup> -Fe4-O4                | 85.3(3)                    | O10-Fe7-O10 <sup>xi</sup>                 | 165.9(6)                       |
| N2-Fe4-O6                               | 89.3(3)                    | O10 <sup>xi</sup> -Fe7-O10 <sup>vii</sup> | 94.6(5)                        |
| N2 <sup>ii</sup> -Fe4-O6                | 89.3(3)                    | O10 <sup>ii</sup> -Fe7-O10 <sup>vii</sup> | 165.9(6)                       |
| O4-Fe4-O6                               | 172.6(4)                   | O10-Fe7-O10 <sup>ii</sup>                 | 94.6(5)                        |
| N10-Fe4-N2 <sup>ii</sup>                | 176.9(3)                   | O13-Fe7-O10 <sup>xi</sup>                 | 94.0(5)                        |
| N10 <sup>ii</sup> -Fe4-N2               | 176.9(3)                   | O13-Fe7-O10 <sup>vii</sup>                | 94.0(5)                        |
| N10 <sup>ii</sup> -Fe4-N2 <sup>ii</sup> | 91.9(3)                    | O13 <sup>xi</sup> -Fe7-O10 <sup>vii</sup> | 72.3(5)                        |
| N10-Fe4-N2                              | 91.9(3)                    | O13-Fe7-O10 <sup>ii</sup>                 | 72.3(5)                        |
| N10 <sup>ii</sup> -Fe4-O4               | 97.5(3)                    | O13-Fe7-O10                               | 72.3(5)                        |
| N10-Fe4-O4                              | 97.5(3)                    | O13 <sup>xi</sup> -Fe7-O10 <sup>xi</sup>  | 72.3(5)                        |
| N10-Fe4-O6                              | 87.7(3)                    | O13 <sup>xi</sup> -Fe7-O10 <sup>ii</sup>  | 94.0(5)                        |
| N10 <sup>ii</sup> -Fe4-O6               | 87.7(3)                    | O13 <sup>xi</sup> -Fe7-O10                | 94.0(5)                        |
| N10 <sup>ii</sup> -Fe4-N10              | 89.0(4)                    | O13-Fe7-O13 <sup>xi</sup>                 | 32.5(12)                       |
| <sup>i</sup> y, x, z                    | <sup>ii</sup> x, y, 1-z    | <sup>iii</sup> y-x, 1-x, z                | <sup>iv</sup> x, y, 2-z        |
| <sup>v</sup> 1-y+x, 2-y, 2-z            | <sup>vi</sup> y, x, 2-z    | <sup>vii</sup> 1-y+x, 2-y, z              | <sup>viii</sup> x, y, -z       |
| <sup>ix</sup> 1-y, 1+x-y, -z            | <sup>x</sup> 1-y, 1+x-y, z | <sup>xi</sup> 1-y+x, 2-y, 1-z             | <sup>xii</sup> 1-x, 1-x+y, 1-z |
| <sup>xiii</sup> 1-y+x, 2-y, -z          |                            |                                           |                                |

---

**Table S3** The bonds lengths(Å) and angles(°) for **2**.

| 2                                         |           |                                          |           |
|-------------------------------------------|-----------|------------------------------------------|-----------|
| Fe/Co1-O3 <sup>i</sup>                    | 2.05(3)   | Fe/Co4-N10 <sup>i</sup>                  | 2.13(3)   |
| Fe/Co1-O3                                 | 2.05(3)   | Fe/Co5-O8                                | 2.08(3)   |
| Fe/Co1-O4                                 | 2.21(3)   | Fe/Co5-O11 <sup>v</sup>                  | 2.20(2)   |
| Fe/Co1-O1 <sup>ii</sup>                   | 2.18(3)   | Fe/Co5-O11                               | 2.20(2)   |
| Fe/Co1-N1 <sup>i</sup>                    | 2.15(2)   | Fe/Co5-O15                               | 2.09(4)   |
| Fe/Co1-N1                                 | 2.15(2)   | Fe/Co5-N8 <sup>v</sup>                   | 2.17(2)   |
| Fe/Co2-N5 <sup>iii</sup>                  | 2.03(4)   | Fe/Co5-N8                                | 2.17(2)   |
| Fe/Co2-N5                                 | 2.03(4)   | Fe/Co6-O9                                | 2.03(3)   |
| Fe/Co2-O2 <sup>iv</sup>                   | 1.93(4)   | Fe/Co6-O11                               | 2.22(2)   |
| Fe/Co2-O2                                 | 1.93(4)   | Fe/Co6-O11 <sup>v</sup>                  | 2.22(2)   |
| Fe/Co3-O5                                 | 2.06(3)   | Fe/Co6-O12                               | 2.07(3)   |
| Fe/Co3-N4 <sup>i</sup>                    | 2.16(2)   | Fe/Co6-N3 <sup>vi</sup>                  | 2.14(2)   |
| Fe/Co3-N4                                 | 2.16(2)   | Fe/Co6-N3 <sup>vii</sup>                 | 2.14(2)   |
| Fe/Co3-N6                                 | 2.02(3)   | Fe/Co7-O10 <sup>viii</sup>               | 2.13(3)   |
| Fe/Co3-N9                                 | 2.14(2)   | Fe/Co7-O10 <sup>i</sup>                  | 2.13(3)   |
| Fe/Co3-N9 <sup>i</sup>                    | 2.14(2)   | Fe/Co7-O10 <sup>ix</sup>                 | 2.13(3)   |
| Fe/Co4-O4                                 | 2.16(4)   | Fe/Co7-O10                               | 2.13(3)   |
| Fe/Co4-O6                                 | 2.34(4)   | Fe/Co7-O13                               | 1.84(9)   |
| Fe/Co4-N2                                 | 2.16(2)   | Fe/Co7-O13 <sup>ix</sup>                 | 1.84(9)   |
| Fe/Co4-N2 <sup>i</sup>                    | 2.16(2)   | Fe/Co7-N7                                | 2.00(5)   |
| Fe/Co4-N10                                | 2.13(3)   |                                          |           |
| O3 <sup>i</sup> -Fe/Co1-O3                | 89.4(18)  | O8-Fe/Co5-O11                            | 89.6(8)   |
| O3 <sup>i</sup> -Fe/Co1-O4                | 89.1(10)  | O8-Fe/Co5-O11 <sup>v</sup>               | 89.6(8)   |
| O3-Fe/Co1-O4                              | 89.1(10)  | O8-Fe/Co5-O15                            | 176.9(12) |
| O3-Fe/Co1-O14 <sup>ii</sup>               | 91.7(11)  | O8-Fe/Co5-N8 <sup>v</sup>                | 92.4(9)   |
| O3 <sup>i</sup> -Fe/Co1-O14 <sup>ii</sup> | 91.7(11)  | O8-Fe/Co5-N8                             | 92.4(9)   |
| O3 <sup>i</sup> -Fe/Co1-N1                | 91.1(11)  | O11-Fe/Co5-O11 <sup>v</sup>              | 77.2(10)  |
| O3-Fe/Co1-N1                              | 172.2(10) | O15-Fe/Co5-O11 <sup>v</sup>              | 92.8(9)   |
| O3 <sup>i</sup> -Fe/Co1-N1 <sup>i</sup>   | 172.3(10) | O15-Fe/Co5-O11                           | 92.8(9)   |
| O3-Fe/Co1-N1 <sup>i</sup>                 | 91.1(11)  | O15-Fe/Co5-N8 <sup>v</sup>               | 85.4(9)   |
| O14 <sup>ii</sup> -Fe/Co1-O4              | 178.8(15) | O15-Fe/Co5-N8                            | 85.4(9)   |
| N1-Fe/Co1-O4                              | 83.2(10)  | N8 <sup>v</sup> -Fe/Co5-O11 <sup>v</sup> | 95.4(8)   |
| N1 <sup>i</sup> -Fe/Co1-O4                | 83.2(10)  | N8-Fe/Co5-O11 <sup>v</sup>               | 172.3(9)  |
| N1 <sup>i</sup> -Fe/Co1-O14 <sup>ii</sup> | 96.0(11)  | N8 <sup>v</sup> -Fe/Co5-O11              | 172.3(9)  |
| N1-Fe/Co1-O14 <sup>ii</sup>               | 96.0(11)  | N8-Fe/Co5-O11                            | 95.4(8)   |
| N1-Fe/Co1-N1 <sup>i</sup>                 | 87.4(13)  | N8 <sup>v</sup> -Fe/Co5-N8               | 92.0(13)  |
| N5-Fe/Co2-N5 <sup>iii</sup>               | 107(2)    | O9-Fe/Co6-O11 <sup>v</sup>               | 90.0(8)   |

|                                            |                              |                                               |                               |
|--------------------------------------------|------------------------------|-----------------------------------------------|-------------------------------|
| O2 <sup>iv</sup> -Fe/Co2-N5 <sup>iii</sup> | 113.8(9)                     | O9-Fe/Co6-O11                                 | 90.0(8)                       |
| O2 <sup>iv</sup> -Fe/Co2-N5                | 113.8(9)                     | O9-Fe/Co6-O12                                 | 174.4(12)                     |
| O2-Fe/Co2-N5 <sup>iii</sup>                | 113.8(9)                     | O9-Fe/Co6-N3 <sup>vi</sup>                    | 90.1(9)                       |
| O2-Fe/Co2-N5                               | 113.8(9)                     | O9-Fe/Co6-N3 <sup>vii</sup>                   | 90.1(9)                       |
| O2 <sup>iv</sup> -Fe/Co2-O2                | 94(2)                        | O11-Fe/Co6-O11 <sup>v</sup>                   | 76.3(10)                      |
| O5-Fe/Co3-N4                               | 87.4(9)                      | O12-Fe/Co6-O11                                | 94.4(9)                       |
| O5-Fe/Co3-N4 <sup>i</sup>                  | 87.4(9)                      | O12-Fe/Co6-O11 <sup>v</sup>                   | 94.4(9)                       |
| O5-Fe/Co3-N9                               | 94.3(8)                      | O12-Fe/Co6-N3 <sup>vi</sup>                   | 86.3(9)                       |
| O5-Fe/Co3-N9 <sup>i</sup>                  | 94.3(8)                      | O12-Fe/Co6-N3 <sup>vii</sup>                  | 86.3(9)                       |
| N4 <sup>i</sup> -Fe/Co3-N4                 | 87.7(12)                     | N3 <sup>vi</sup> -Fe/Co6-O11                  | 92.8(8)                       |
| N6-Fe/Co3-O5                               | 177.1(11)                    | N3 <sup>vii</sup> -Fe/Co6-O11                 | 169.1(8)                      |
| N6-Fe/Co3-N4                               | 90.5(8)                      | N3 <sup>vi</sup> -Fe/Co6-O11 <sup>v</sup>     | 169.1(8)                      |
| N6-Fe/Co3-N4 <sup>i</sup>                  | 90.5(8)                      | N3 <sup>vii</sup> -Fe/Co6-O11 <sup>v</sup>    | 92.8(8)                       |
| N6-Fe/Co3-N9 <sup>i</sup>                  | 87.7(8)                      | N3 <sup>vii</sup> -Fe/Co6-N3 <sup>vi</sup>    | 98.1(13)                      |
| N6-Fe/Co3-N9                               | 87.7(8)                      | O10-Fe/Co7-O10 <sup>viii</sup>                | 84.8(16)                      |
| N9-Fe/Co3-N4 <sup>i</sup>                  | 90.6(8)                      | O10 <sup>i</sup> -Fe/Co7-O10 <sup>viii</sup>  | 166(2)                        |
| N9 <sup>i</sup> -Fe/Co3-N4 <sup>i</sup>    | 177.5(9)                     | O10 <sup>i</sup> -Fe/Co7-O10 <sup>ix</sup>    | 84.8(16)                      |
| N9-Fe/Co3-N4                               | 177.5(9)                     | O10-Fe/Co7-O10 <sup>ix</sup>                  | 166(2)                        |
| N9 <sup>i</sup> -Fe/Co3-N4                 | 90.6(8)                      | O10-Fe/Co7-O10 <sup>i</sup>                   | 93.6(16)                      |
| N9-Fe/Co3-N9 <sup>i</sup>                  | 91.1(12)                     | O10 <sup>ix</sup> -Fe/Co7-O10 <sup>viii</sup> | 93.6(16)                      |
| O4-Fe/Co4-O6                               | 173.4(13)                    | O13-Fe/Co7-O10 <sup>i</sup>                   | 69.5(18)                      |
| N2 <sup>i</sup> -Fe/Co4-O4                 | 85.2(9)                      | O13-Fe/Co7-O10 <sup>ix</sup>                  | 97(2)                         |
| N2-Fe/Co4-O4                               | 85.2(9)                      | O13-Fe/Co7-O10                                | 69.5(18)                      |
| N2-Fe/Co4-O6                               | 89.9(9)                      | O13-Fe/Co7-O10 <sup>viii</sup>                | 97(2)                         |
| N2 <sup>i</sup> -Fe/Co4-O6                 | 89.9(9)                      | O13 <sup>ix</sup> -Fe/Co7-O10 <sup>viii</sup> | 69.5(18)                      |
| N2-Fe/Co4-N2 <sup>i</sup>                  | 85.4(13)                     | O13 <sup>ix</sup> -Fe/Co7-O10 <sup>ix</sup>   | 69.5(18)                      |
| N10 <sup>i</sup> -Fe/Co4-O4                | 97.2(10)                     | O13 <sup>ix</sup> -Fe/Co7-O10                 | 97(2)                         |
| N10-Fe/Co4-O4                              | 97.2(10)                     | O13 <sup>ix</sup> -Fe/Co7-O10 <sup>i</sup>    | 97(2)                         |
| N10-Fe/Co4-O6                              | 87.4(10)                     | O13-Fe/Co7-O13 <sup>ix</sup>                  | 42(5)                         |
| N10 <sup>i</sup> -Fe/Co4-O6                | 87.4(10)                     | O13-Fe/Co7-N7                                 | 159(2)                        |
| N10 <sup>i</sup> -Fe/Co4-N2                | 176.6(9)                     | O13 <sup>ix</sup> -Fe/Co7-N7                  | 159(2)                        |
| N10-Fe/Co4-N2                              | 92.6(9)                      | N7-Fe/Co7-O10 <sup>viii</sup>                 | 96.8(11)                      |
| N10-Fe/Co4-N2 <sup>i</sup>                 | 176.6(9)                     | N7-Fe/Co7-O10 <sup>ix</sup>                   | 96.8(11)                      |
| N10 <sup>i</sup> -Fe/Co4-N2 <sup>i</sup>   | 92.6(9)                      | N7-Fe/Co7-O10 <sup>i</sup>                    | 96.8(11)                      |
| N10-Fe/Co4-N10 <sup>i</sup>                | 89.4(13)                     | N7-Fe/Co7-O10                                 | 96.8(11)                      |
| <sup>i</sup> x, y, 1-z                     | <sup>ii</sup> y-x, 1-x, z    | <sup>iii</sup> x, y, 2-z                      | <sup>iv</sup> 1-y+x, 2-y, 2-z |
| <sup>v</sup> x, y, -z                      | <sup>vi</sup> 1-y, 1+x-y, z  | <sup>vii</sup> 1-y, 1+x-y, -z                 | <sup>viii</sup> 1-y+x, 2-y, z |
| <sup>ix</sup> 1-y+x, 2-y, 1-z              | <sup>x</sup> 1-x, 1-x+y, 1-z | <sup>xi</sup> 1-y+x, 2-y, -z                  | <sup>xii</sup> y, x, z        |
| <sup>xiii</sup> y, x, 2-z                  |                              |                                               |                               |

---

**Table S4** Valence bonds data of **1**.

| Atom #1 | Atom #2 | Length | Fe2 r0 | Fe3 r0 | Fe2 s    | Fe2 BVS  | Fe3 s    | Fe3 BVS  |
|---------|---------|--------|--------|--------|----------|----------|----------|----------|
| Fe1     | N1      | 2.149  | 1.769  | 1.815  | 0.35807  | 1.910025 | 0.405472 | 2.234117 |
| Fe1     | N1      | 2.149  | 1.769  | 1.815  | 0.35807  |          | 0.405472 |          |
| Fe1     | O14     | 2.193  | 1.7    | 1.765  | 0.263835 |          | 0.314505 |          |
| Fe1     | O3      | 2.091  | 1.7    | 1.765  | 0.347581 |          | 0.414335 |          |
| Fe1     | O3      | 2.091  | 1.7    | 1.765  | 0.347581 |          | 0.414335 |          |
| Fe1     | O4      | 2.236  | 1.7    | 1.765  | 0.234887 |          | 0.279998 |          |
| Fe2     | N5      | 2.058  | 1.769  | 1.815  | 0.457911 | 1.733368 | 0.51853  | 2.011618 |
| Fe2     | O2      | 2.031  | 1.7    | 1.765  | 0.408773 |          | 0.487279 |          |
| Fe2     | N5      | 2.058  | 1.769  | 1.815  | 0.457911 |          | 0.51853  |          |
| Fe2     | O2      | 2.031  | 1.7    | 1.765  | 0.408773 |          | 0.487279 |          |
| Fe3     | N4      | 2.178  | 1.769  | 1.815  | 0.331077 | 2.026545 | 0.374906 | 2.315621 |
| Fe3     | N4      | 2.178  | 1.769  | 1.815  | 0.331077 |          | 0.374906 |          |
| Fe3     | N6      | 2.139  | 1.769  | 1.815  | 0.367879 |          | 0.41658  |          |
| Fe3     | N9      | 2.186  | 1.769  | 1.815  | 0.323995 |          | 0.366887 |          |
| Fe3     | N9      | 2.186  | 1.769  | 1.815  | 0.323995 |          | 0.366887 |          |
| Fe3     | O5      | 2.09   | 1.7    | 1.765  | 0.348522 |          | 0.415456 |          |
| Fe4     | N10     | 2.151  | 1.769  | 1.815  | 0.35614  | 1.805958 | 0.403286 | 2.070247 |
| Fe4     | N10     | 2.151  | 1.769  | 1.815  | 0.35614  |          | 0.403286 |          |
| Fe4     | O4      | 2.211  | 1.7    | 1.765  | 0.251307 |          | 0.299571 |          |
| Fe4     | O6      | 2.353  | 1.7    | 1.765  | 0.17121  |          | 0.204091 |          |
| Fe4     | N2      | 2.173  | 1.769  | 1.815  | 0.335581 |          | 0.380006 |          |
| Fe4     | N2      | 2.173  | 1.769  | 1.815  | 0.335581 |          | 0.380006 |          |
| Fe5     | N8      | 2.163  | 1.769  | 1.815  | 0.344774 | 1.836447 | 0.390417 | 2.147995 |
| Fe5     | O11     | 2.209  | 1.7    | 1.765  | 0.252669 |          | 0.301194 |          |
| Fe5     | O8      | 2.146  | 1.7    | 1.765  | 0.299571 |          | 0.357103 |          |
| Fe5     | O15     | 2.097  | 1.7    | 1.765  | 0.34199  |          | 0.40767  |          |
| Fe5     | N8      | 2.163  | 1.769  | 1.815  | 0.344774 |          | 0.390417 |          |
| Fe5     | O11     | 2.209  | 1.7    | 1.765  | 0.252669 |          | 0.301194 |          |
| Fe6     | O11     | 2.23   | 1.7    | 1.765  | 0.238728 | 1.940011 | 0.284575 | 2.271114 |
| Fe6     | O12     | 2.062  | 1.7    | 1.765  | 0.37592  |          | 0.448116 |          |
| Fe6     | O9      | 2.047  | 1.7    | 1.765  | 0.391473 |          | 0.466656 |          |
| Fe6     | N3      | 2.16   | 1.769  | 1.815  | 0.347581 |          | 0.393595 |          |
| Fe6     | O11     | 2.23   | 1.7    | 1.765  | 0.238728 |          | 0.284575 |          |
| Fe6     | N3      | 2.16   | 1.769  | 1.815  | 0.347581 |          | 0.393595 |          |
| Fe7     | N7      | 2.033  | 1.769  | 1.815  | 0.48992  | 2.035168 | 0.554777 | 2.396792 |
| Fe7     | O10     | 2.157  | 1.7    | 1.765  | 0.290795 |          | 0.346643 |          |
| Fe7     | O10     | 2.157  | 1.7    | 1.765  | 0.290795 |          | 0.346643 |          |
| Fe7     | O13     | 2.056  | 1.7    | 1.765  | 0.382066 |          | 0.455442 |          |
| Fe7     | O10     | 2.157  | 1.7    | 1.765  | 0.290795 |          | 0.346643 |          |
| Fe7     | O10     | 2.157  | 1.7    | 1.765  | 0.290795 |          | 0.346643 |          |



**Table S5** ICP-OES test data of **2**.

| Sample | $m_0/g$ | $V_0/mL$ | element | $C_o/mg/L$ | f   | $C_1/mg/L$ | $C_x/mg/kg$ | W/%    | $W^c/\%$ |
|--------|---------|----------|---------|------------|-----|------------|-------------|--------|----------|
| 1      | 0.0654  | 25       | Fe      | 2.427      | 100 | 242.7      | 92775.2     | 9.28%  | 9.77%    |
| 1      | 0.0654  | 25       | Fe      | 2.433      | 100 | 243.3      | 93004.6     | 9.30%  | 9.79     |
| 1      | 0.0654  | 25       | Co      | 4.690      | 100 | 469        | 179281.3    | 17.93% | 18.87    |
| 1      | 0.0654  | 25       | Co      | 4.693      | 100 | 469.3      | 179396.0    | 17.94% | 18.88    |

The thermogravimetric analysis of the prepared and activated **2** shows that **2** contains 5% by mass of low boiling point solvent (**Fig. S2**). These solvents are not localized in the crystal structure, thus, metal contents of the ICP test was converted according to the thermogravimetric result of the crystal molecular formula by  $W^c/\% = W\% \div 0.95$ . And the calculated molecular formula of **2** is  $C_{53}H_{55}Co_{7.75}Fe_{4.25}N_{35}O_{34}$ , which can be simplified to  $C_{53}H_{55}Co_8Fe_4N_{35}O_{34}$  by accounting one significant digit of the metal ion.

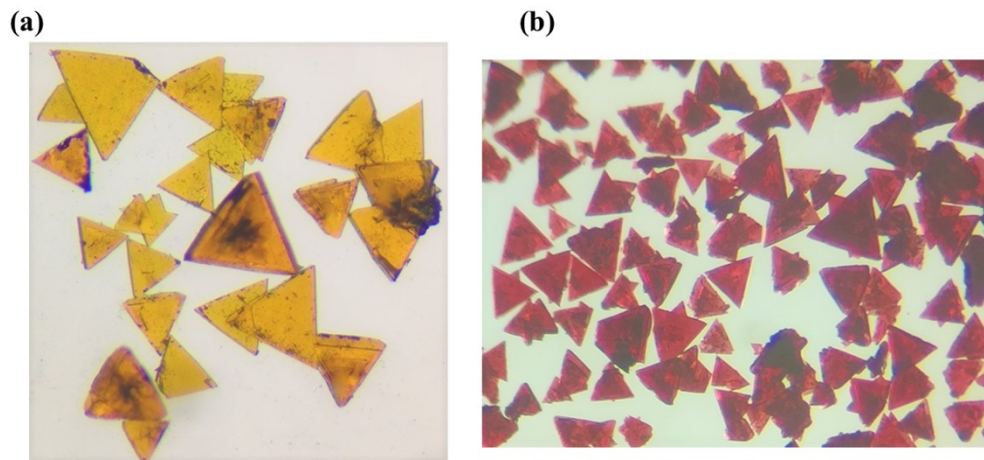**Fig. S1** Shape of single crystal **1** (a) and **2** (b).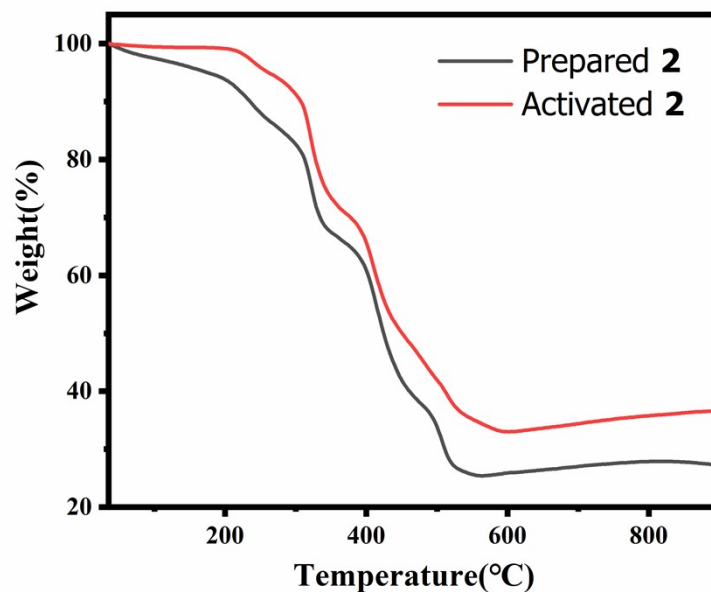

Fig. S2 TGA profiles recorded for **2** in N<sub>2</sub> atmosphere.

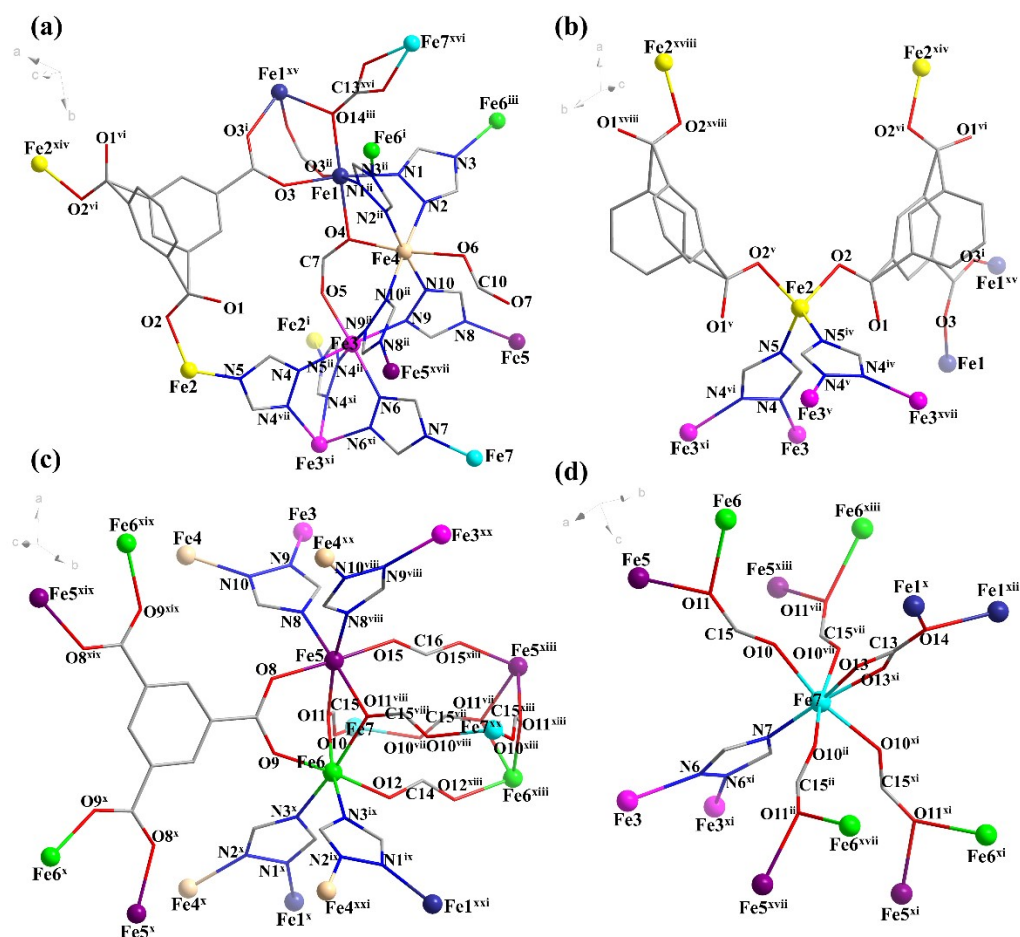

**Fig. S3** Coordination modes and linkages of the metal ions and ligands in **1**. (a) for Fe1, Fe3 and Fe4; (b) for Fe2; (c) for Fe5 and Fe6; (d) for Fe7. Symmetric code: <sup>i</sup>y, x, z; <sup>ii</sup>x, y, 1-z; <sup>iii</sup>y-x, 1-x, z; <sup>iv</sup>x, y, 2-z; <sup>v</sup>1-y+x, 2-y, 2-z; <sup>vi</sup>y, x, 2-z; <sup>vii</sup>1-y+x, 2-y, z; <sup>viii</sup>x, y, -z; <sup>ix</sup>1-y, 1+x-y, -z; <sup>x</sup>1-y, 1+x-y, z; <sup>xi</sup>1-y+x, 2-y, 1-z; <sup>xii</sup>1-x, 1-x+y, 1-z; <sup>xiii</sup>1-y+x, 2-y, -z; <sup>xiv</sup>2-y, 1+x-y, z; <sup>xv</sup>y, x, 1-z; <sup>xvi</sup>y-x, 1-x, 1-z; <sup>xvii</sup>x, y, 1+z; <sup>xviii</sup>1-x+y, 2-x, 2-z; <sup>xix</sup>y-x, 1-x, -z; <sup>xx</sup>x, y, z-1; <sup>xxi</sup>1-y, 1+x-y, z-1.

As shown in **Fig. S3**, Fe1 is coordinated by two N atoms and four O atoms from two tz ligands, two formates and two carboxylate groups from btc or formate with disorder. The Fe1-N/O distances are in the normal range of 2.110-2.250 Å (**Table S2**). Fe3 is coordinated by one formate and five tz ligands, and Fe4 is coordinated by two formates and four tz ligands. The coordination environment of Fe5 and Fe6 are very similar which are both coordinated by three formates, one btc and two tz ligands. Fe7 ion locates in a slightly distorted octahedral geometry coordinated by five formate anions and one tz ligand, in which the formate containing O13 atom is disordered. Fe2 ion is four coordinated by two O atoms from two disorder btc or formate anions and two N atoms from two tz ligands.

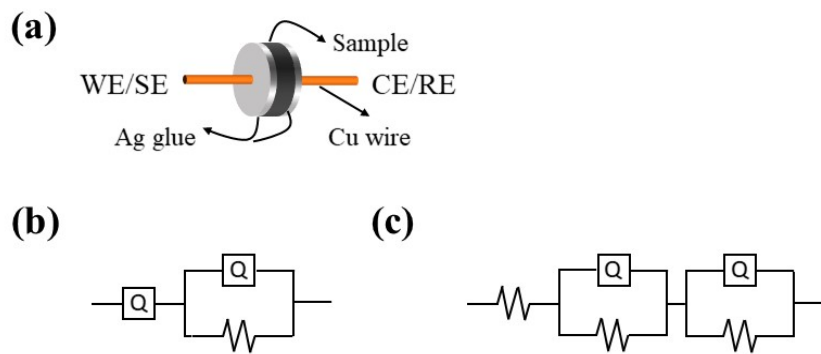

Fig. S4 The compacted tablet model (a) and circuit model of 1 (b), 2 (c)

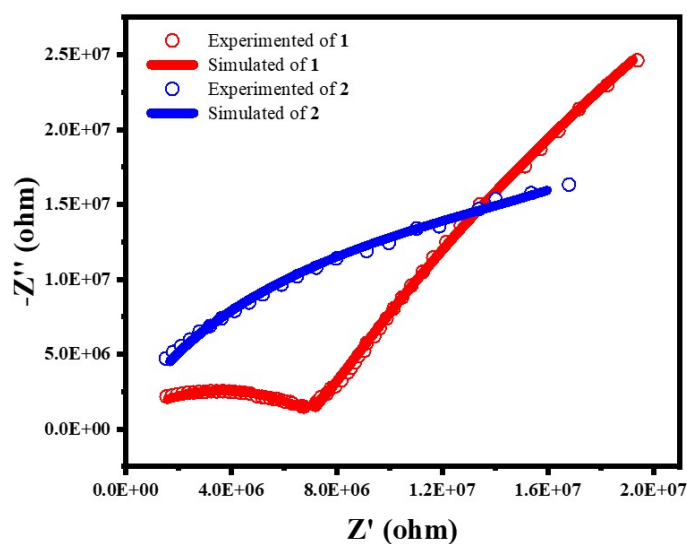

Fig. S5 Electrochemical impedance spectroscopy of 1 and 2.

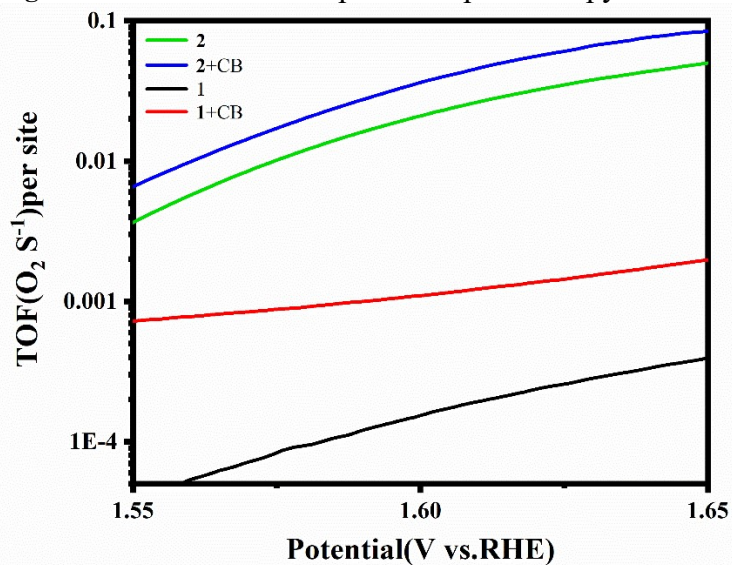

Fig. S6 TOF values collected at different potentials of 1, 2, 1 mixed CB and 2 mixed CB.

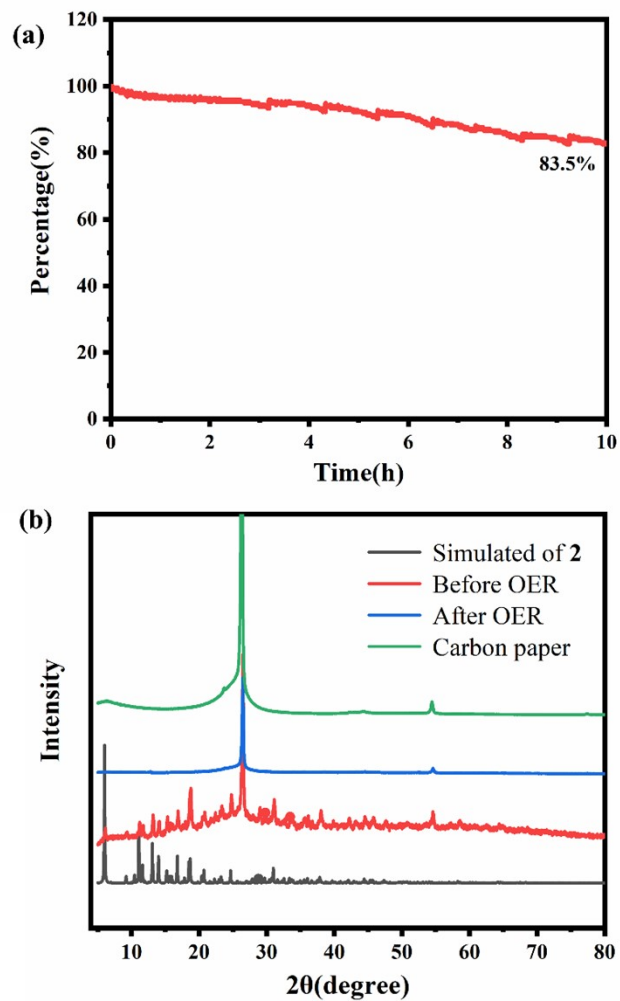

**Fig. S7** a) Continuous OER i-t test for **2** at 1.62 V. b) the PXRD of carbon papers, **2** coated on carbon papers before OER i-t test and **2** coated on carbon papers after 2 h OER i-t test.

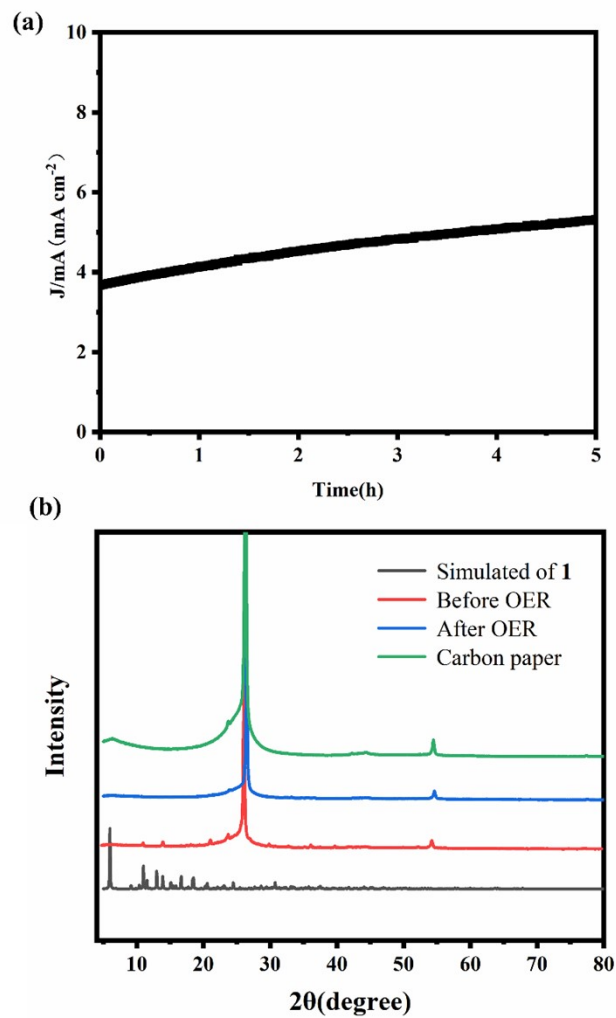

**Fig. S8** a) Continuous OER i-t test for **1** at 1.62 V. b) the PXRD of carbon papers, **1** coated on carbon papers before OER i-t test and **1** coated on carbon papers after 2 h OER i-t test.

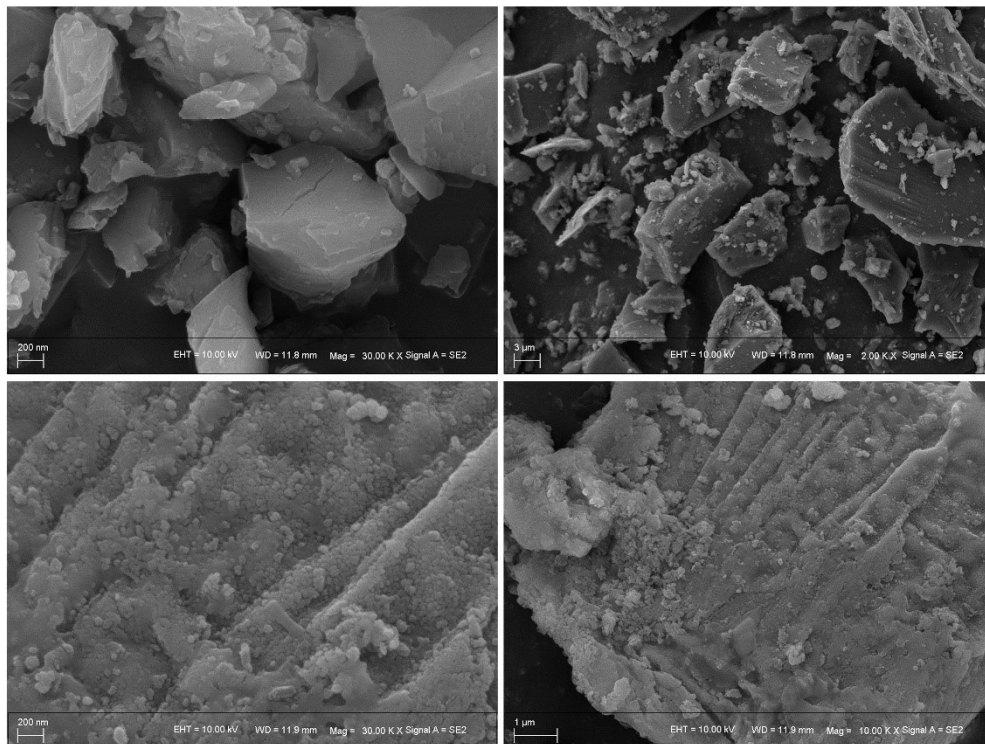

**Fig. S9** SEM images of **1** before (top) and after (bottom) 2 h OER test.

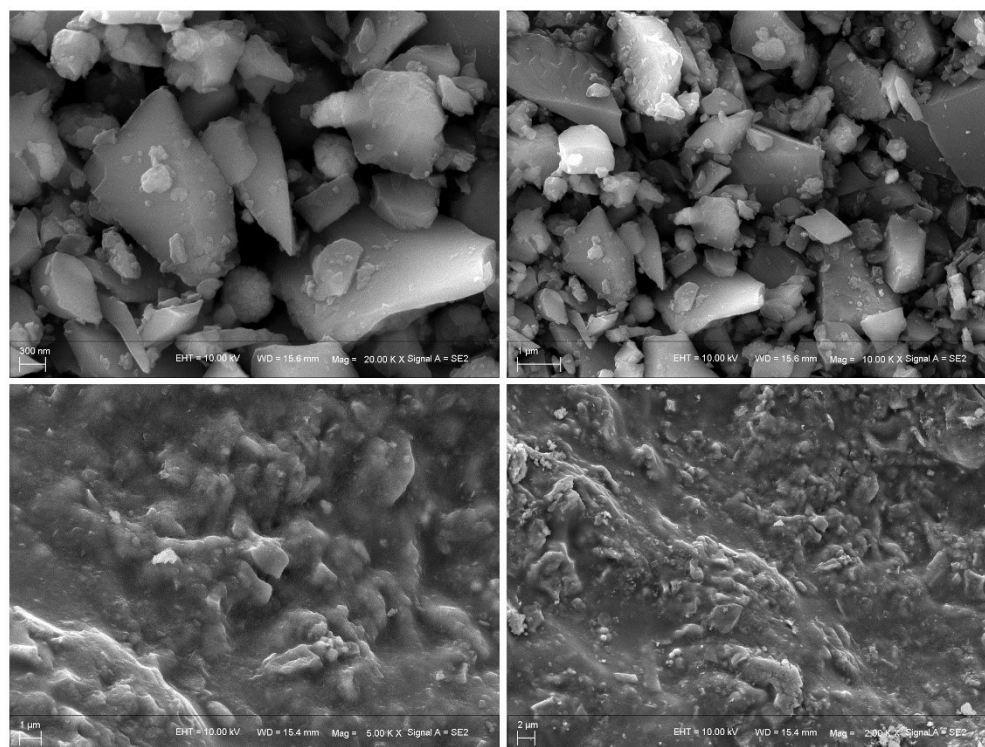

**Fig. 10** SEM images of **2** before (top) and after (bottom) OER test.
